# Supplementary material
Source: HighWire-hosted journal article supplement (https://qualitysafety.bmj.com/highwire/filestream/147180/field_highwire_adjunct_files/0/Appendix_A_manuscript_file_AE.docx)
Supplement: Appendix_A_manuscript_file_AE.docx [file Appendix_A_manuscript_file_AE.docx]

**Appendix A : Algorithms**

| Indicator | Definition | |
| --- | --- | --- |
|  | Inclusion | Exclusion |
| Pressure Ulcer | ICD-9-CM code of pressure ulcer* in any secondary diagnosis field | Primary diagnosis of pressure ulcer*; age <16 years, length of stay<5 days; MDC 9; MDC 14; with any diagnosis of hemiplegia*, paraplegia*, or quadriplegia*; with ICD-9-CM code of spina bifida* or anoxic brain damage*; with an ICD-9-CM procedure code for debridement* or pedicle graft *before or on the same day as the major operating room procedure* (surgical cases only); admitted from a long-term care facility; transferred from an acute care facility |
| Postoperative pulmonary embolism or deep vein thrombosis | ICD-9-CM codes for deep vein thrombosis* or pulmonary embolism* in any secondary diagnosis field | Medical APR-DRG’s; Primary diagnosis of deep vein thrombosis* or pulmonary embolism*; age <16 years; where a procedure for interruption of vena cava* is the only operating room procedure*; where a procedure for interruption of vena cava* occurs before or on the same day as the first operating room procedure; MDC 14 |
| Postoperative sepsis | ICD-9-CM code for sepsis* in any secondary diagnosis field | Medical APR-DRG’s; Primary diagnosis of sepsis*; Infection ICD-9-CM codes as primary diagnosis*; age <16 years; non-elective admissions; any ICD-9-CM code for immune-compromised state* or cancer*; MDC 14; length of stay of less than 4 days; Infection APR-DRG’s (49-50, 113, 137, 139, 193, 344, 345, 383, 463, 531, 710, 720, 724), Cancer APR-DRG’s (41, 58, 110, 136, 240, 281, 362, 382, 442, 461, 500, 511-512, 530, 680-683, 690-694, 862) |
| Ventilator associated pneumonia | ICD-9-CM pneumonia* in any secondary diagnosis field AND a Belgian nomenclature code for artifcial ventilation (211046) | Primary diagnosis of pneumonia* or 997.3; age <16 years; with any diagnosis code for viral pneumonia*; MDC 4; MDC 14; with any diagnosis of immunocompromised state* |
| Post-operative wound infection | ICD-9-CM code of wound infection (99851, 99859) in any secondary diagnosis field | Medical APR-DRG’s; Primary diagnosis of wound infection (99851, 99859); age <16 years; |

*patient safety indicators (Department of Health and Human Services. Guide to Patient Safety Indicators. 2006. Rockville, MD, Agency for Healthcare Research and Quality.)
